# Supplementary material for: Improving the oxygen redox stability of NaCl-type cation disordered Li2MnO3 in a composite structure of Li2MnO3 and spinel-type LiMn2O4
Source: Royal Society of Chemistry journal article supplement (doi:10.1039/c8ta11807h), 2019-01-01
Supplement: c8ta11807h1.pdf [file c8ta11807h1.pdf]

# Supplementary information of Improving oxygen redox stability of a NaCl-type Cation Disordered $\text{Li}_2\text{MnO}_3$ in a Composite structure of $\text{Li}_2\text{MnO}_3$ and Spinel-type $\text{LiMn}_2\text{O}_4$

R. Kataoka, N. Taguchi, T. Kojima, N. Takeichi, T. Kiyobayashi

Department of Energy and Environment, Research Institute for Electrochemical Energy, National Institute of Advanced Industrial Science and Technology (AIST)

1-8-31 Midorigaoka, Ikeda, Osaka 563-8577, Japan

Tel: +81-72-751-9651, Fax: +81-72-751-9629.

[riki-kataoka@aist.go.jp](mailto:riki-kataoka@aist.go.jp)

January 18, 2019

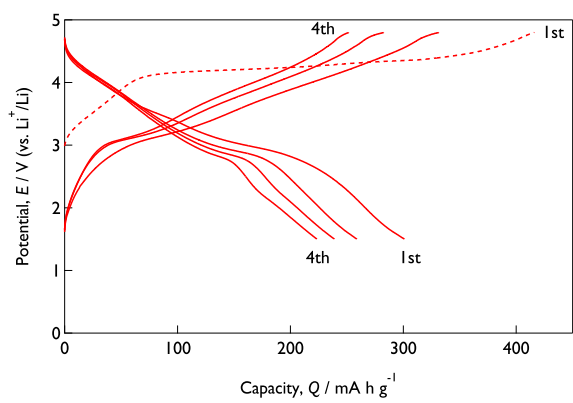

(a)

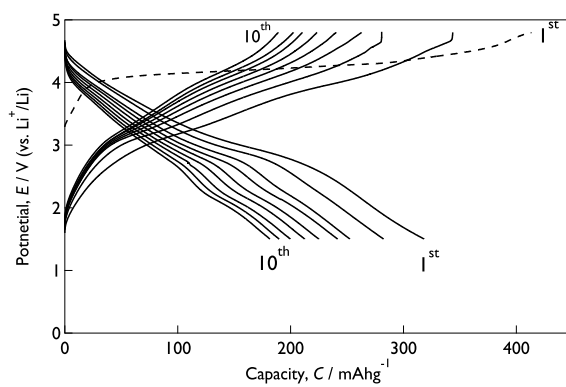

(b)

Figure S1: Charge and discharge curves of  $m\text{-Li}_2\text{MnO}_3$  milled for (a) 60 h and (b) 86 h.

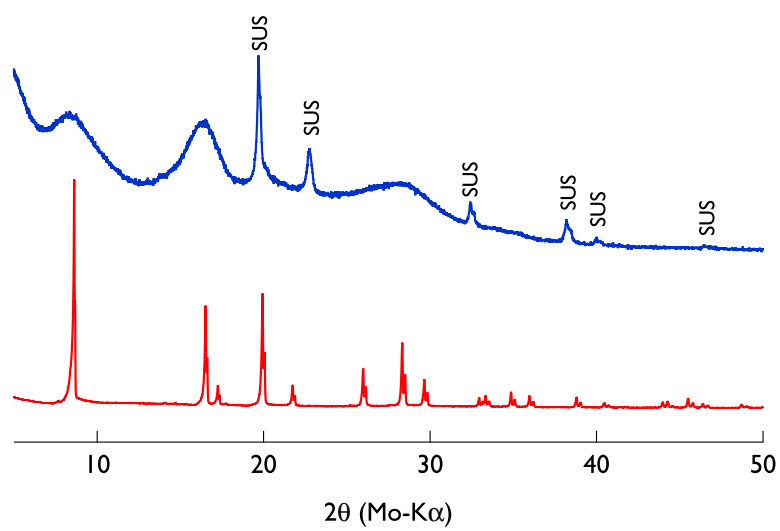

Figure S2: XRD patterns of  $\text{LiMn}_2\text{O}_4$  before (bottom) and after (top) mechanical milling.

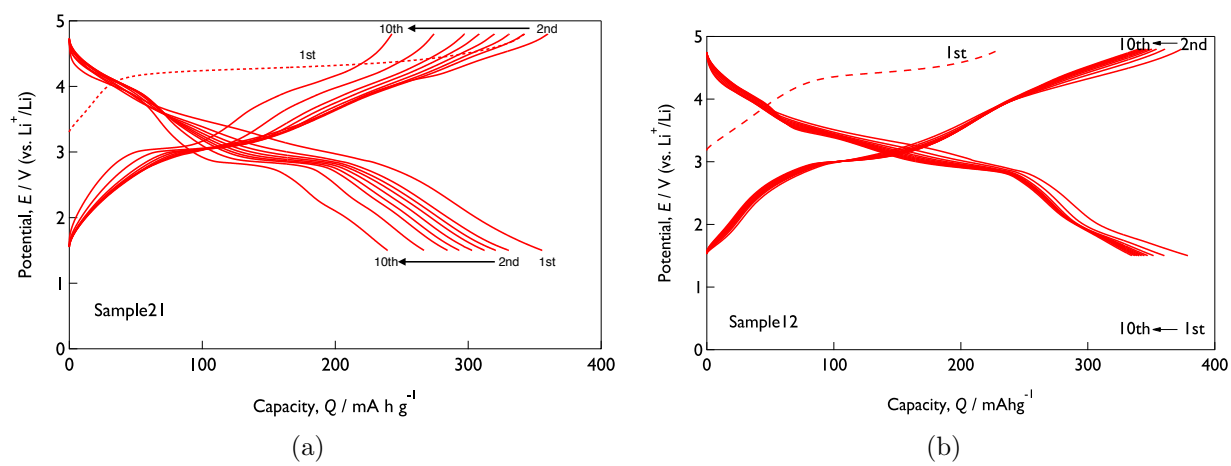

Figure S3: Charge and discharge curves of (a) Sample21 and (b) Sample12.

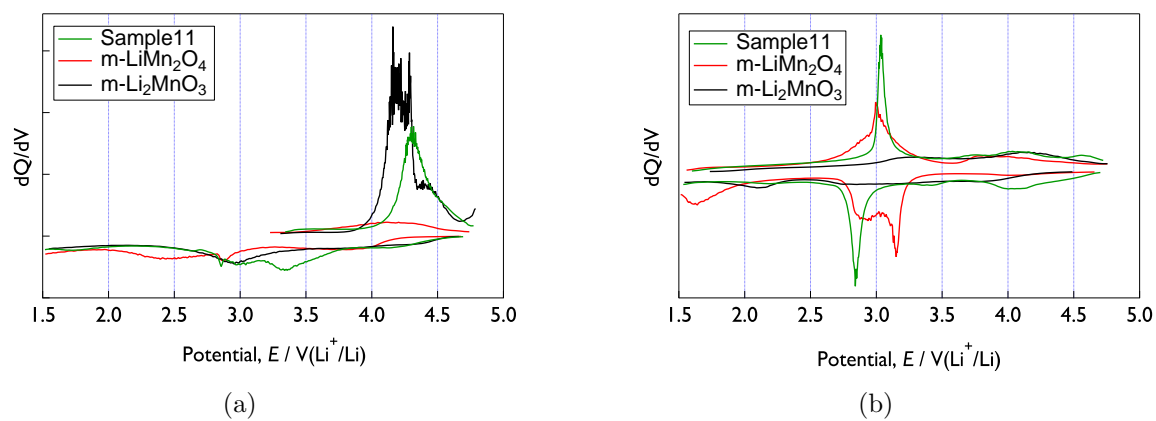

Figure S4:  $dQ/dV$  curves of Sample11,  $m\text{-Li}_2\text{MnO}_3$  and  $m\text{-LiMn}_2\text{O}_4$  during (a) 1st and (b) 10th cycling.

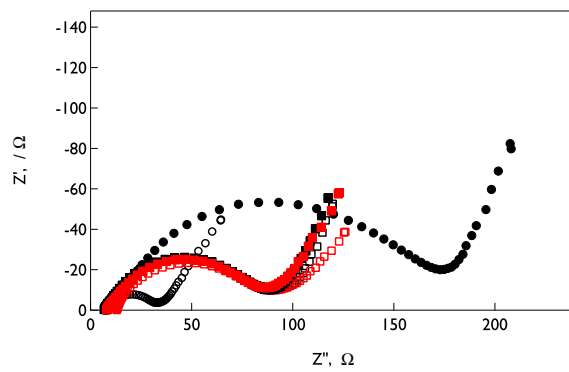

Figure S5: Cole-cole plots of Sample11(red square),  $m\text{-Li}_2\text{MnO}_3$ (black circle) and  $m\text{-LiMn}_2\text{O}_4$ (black circle) after initial(open symbol) and 10 cycles(filled symbol).

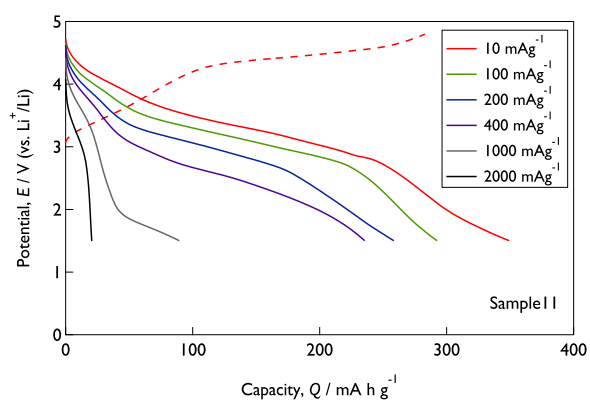

(a)

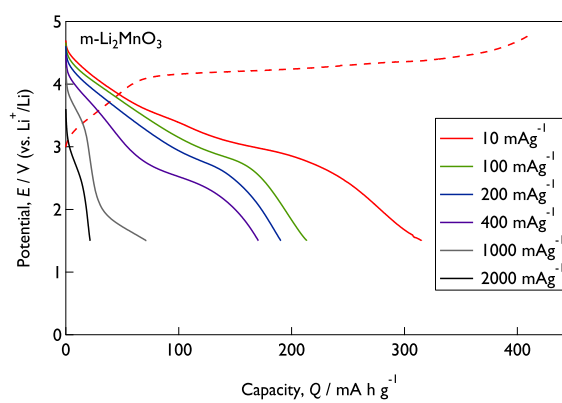

(b)

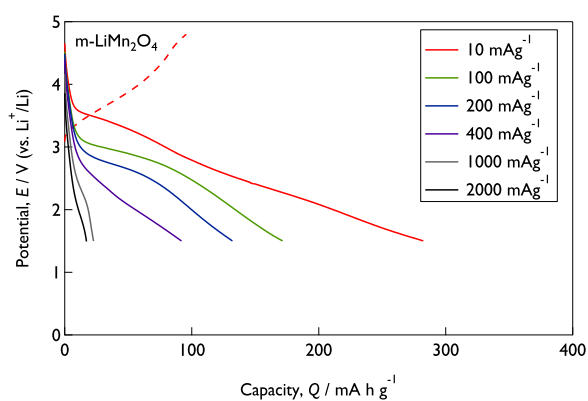

(c)

Figure S6: Initial charge curve and discharge curves at various current densities of (a) Sample11, (b)  $\text{m-Li}_2\text{MnO}_3$  and (c)  $\text{m-LiMn}_2\text{O}_4$ .

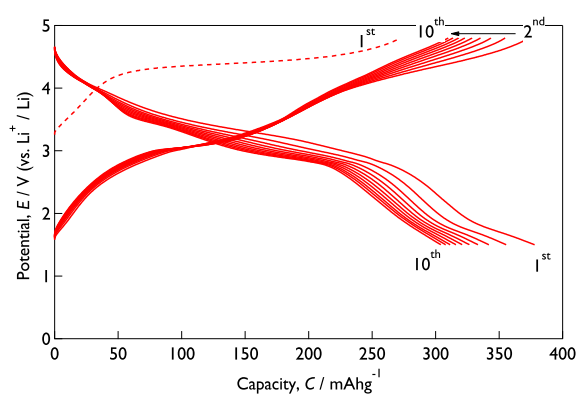

(a)

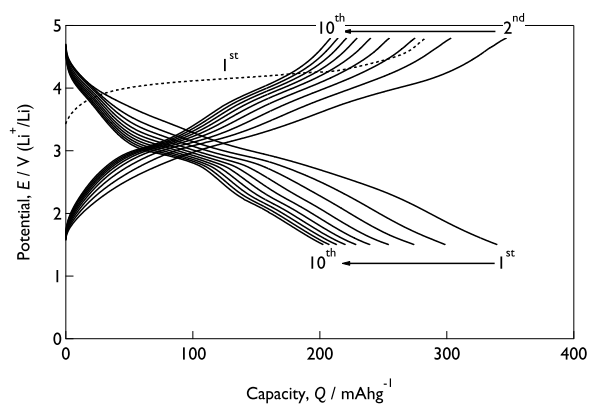

(b)

Figure S7: Charge and discharge curves of (a) Sample11 and (b) mixture of  $m\text{-Li}_2\text{MnO}_3$  and  $m\text{-LiMn}_2\text{O}_4$  milled by hand.
